# Supplementary material for: Effects of Different Ratios of Carbohydrate–Fat in Enteral Nutrition on Metabolic Pattern and Organ Damage in Burned Rats
Source: MDPI journal article supplement (doi:10.3390/nu14173653), 2022-09-04
Supplement: s1 [file s1]

## Supporting Information

# Effects of different ratios of carbohydrate–fat in enteral nutrition on metabolic pattern and organ damage in burned rats

Yongjun Yang <sup>1,†</sup>, Sen Su <sup>1,†</sup>, Yong Zhang <sup>2,†</sup>, Dan Wu <sup>1</sup>, Chao Wang <sup>2</sup>, Yan Wei <sup>1</sup>  
and Xi Peng <sup>1,2,3,\*</sup>

<sup>1</sup> Clinical Medical Research Center, Southwest Hospital, Third Military Medical University (Army Medical University), Chongqing 400038, China

<sup>2</sup> State Key Laboratory of Trauma, Burns and Combined Injury, Institute of Burn Research, Southwest Hospital, Third Military Medical University (Army Medical University), Chongqing 400038, China

<sup>3</sup> Shriners Burns Hospital, Massachusetts General Hospital, Harvard Medical School, Boston, MA 02114, USA

\* Correspondence: pxlrmm@163.com

† These authors contributed equally to this work.

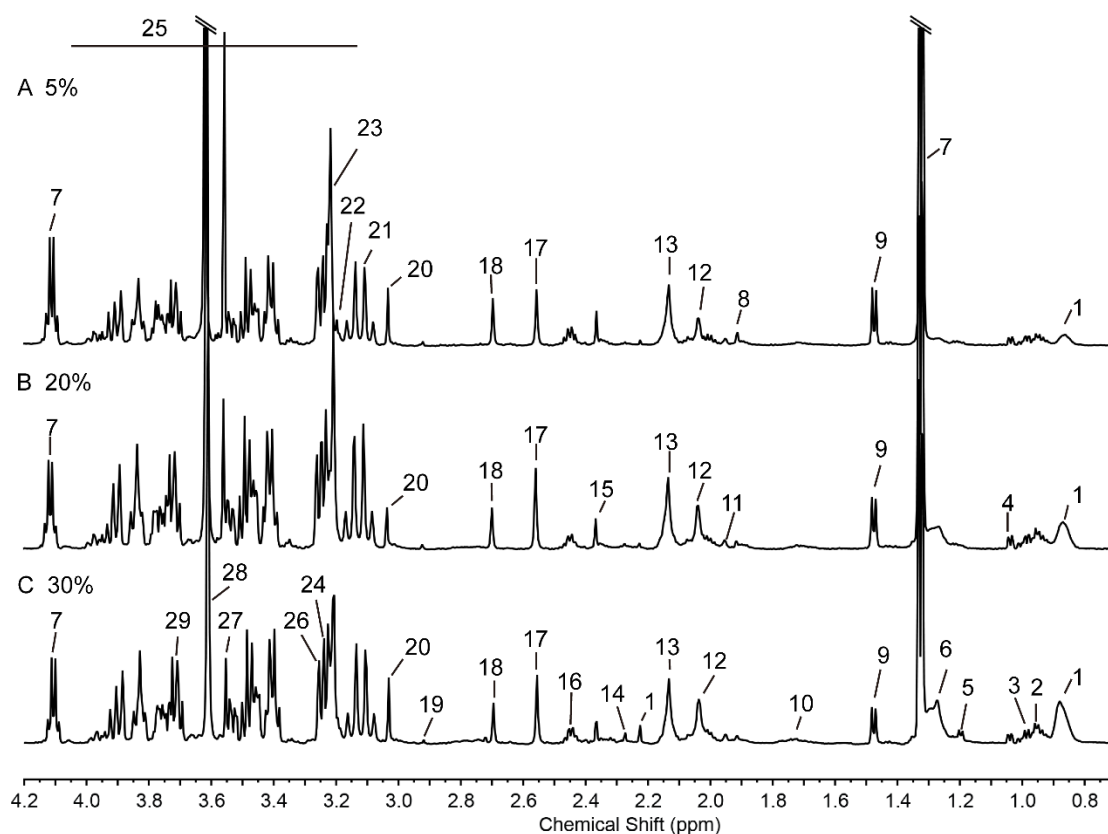

**Figure S1.** Representative 600 MHz  $^1\text{H}$  NMR spectra of plasma (A. 5%, B. 20% and C. 30% group). The  $^1\text{H}$ -NMR signals identified were: 1. Lipid, 2. Isoleucine, 3. Leucine, 4. Valine, 5. Isobutyrate, 6. 3-hydroxybutyrate, 7. Lactate, 8. Lysine, 9. Alanine, 10. Arginine, 11. Acetate, 12. N-acetylated glycoproteins (NAG), 13. O-acetylated glycoproteins (OAG), 14. Acetoacetate, 15. Pyruvate, 16. Glutamine, 17. Succinate, 18. Dimethylamine, 19. Dimethylglycine, 20. Creatinine, 21. Phenylalanine, 22. Choline, 23. Trimethylamine N-oxide (TMAO), 24. Phosphocholine, 25.  $\alpha$ -glucose, 26. Betaine, 27. Glycine, 28. Oxalic acid, and 29. Glycerol.

**Table S1.** Nutritional supplement formula.

| Control group       |           |             | Burn + 5% fat group |            | Burn + 10% fat group |             | Burn + 20% fat group |            | Burn + 30% fat group |             |
|---------------------|-----------|-------------|---------------------|------------|----------------------|-------------|----------------------|------------|----------------------|-------------|
| Name                | Weight    | Energy      | Weight              | Energy     | Weight               | Energy      | Weight               | Energy     | Weight               | Energy      |
| Peptisorb           | 100 g     | 402 Kcal    | 100 g               | 402 Kcal   | 100 g                | 402 Kcal    | 100 g                | 402 Kcal   | 100 g                | 402 Kcal    |
| Glucose             | -         | -           | 155.8 g             | 623.1 Kcal | 104.7 g              | 562.8 Kcal  | 100.5 g              | 442.2 Kcal | -                    | -           |
| Amino acid          | 28.14 g   | 112.56 Kcal | 43.28 g             | 180.9 Kcal | 43.28 g              | 180.9 Kcal  | 43.28 g              | 180.9 Kcal | 28.14 g              | 112.56 Kcal |
| Medium long chain   | 115.64 ML | 168.84 Kcal | -                   | -          | 41.3 ML              | 60.3 Kcal   | 123.9 ML             | 180.9 Kcal | 115.64 ML            | 168.84 Kcal |
| Fatty acid emulsion |           |             |                     |            |                      |             |                      |            |                      |             |
| Total               | 272.34 g  | 683.4 Kcal  | 299.08 g            | 1206 Kcal  | 301.42 g             | 1266.3 Kcal | 398.28 g             | 1206 Kcal  | 272.34 g             | 683.4 Kcal  |

**Table S2.** Assay values of REE in each group of rats from 1–14 days after burn injury.

|                                  |     | PBD0       | PBD1       | PBD2       | PBD3       | PBD4       | PBD5       | PBD6       | PBD7       | PBD8       | PBD9       | PBD10      | PBD11      | PBD12      | PBD13      | PBD14      |
|----------------------------------|-----|------------|------------|------------|------------|------------|------------|------------|------------|------------|------------|------------|------------|------------|------------|------------|
| <b>REE</b><br><b>(Kcal/kg/d)</b> | C   | 251.5±11.2 | 245.9±11.7 | 246.4±12.8 | 249.8±9.9  | 244.4±9.9  | 249.8±10   | 253.7±13   | 251.3±11.5 | 244.8±9.9  | 248.4±12.6 | 251.7±12.8 | 252.8±12.1 | 252.9±11.9 | 249.1±14.5 | 251.4±12.6 |
|                                  | 5 % | 256.8±14   | 246.9±11.8 | 250.3±5    | 234.6±17.2 | 238.5±12.9 | 247.1±11.2 | 256.7±5.2  | 255.4±14.3 | 263.4±12.9 | 261.5±12.1 | 262±6.2    | 259.3±14.6 | 263.6±7.3  | 268.4±10.4 | 267.8±12.6 |
|                                  | 10% | 259.1±16   | 242.7±9.9  | 240.9±20.7 | 223.5±18.7 | 230.1±13.5 | 238.1±12.6 | 244±14.1   | 243.2±10.2 | 244.6±11.2 | 242±12.4   | 248.3±10   | 245.5±11.7 | 243.3±8.8  | 249.7±11.6 | 255.5±12.3 |
|                                  | 20% | 253.6±11.5 | 230.8±18.5 | 225.1±15.2 | 211.9±11.4 | 225±16.7   | 234.6±11.1 | 241.2±12.7 | 250.1±15.6 | 250.7±10.7 | 269.6±11.4 | 269.9±12   | 273.2±11.1 | 273±17.5   | 273±13     | 276.8±10.2 |
|                                  | 30% | 259.4±10.1 | 222.2±10.8 | 214±12.6   | 197.3±11.5 | 218.4±12.4 | 227.3±11.6 | 255.2±11.2 | 269.7±14.8 | 280.3±12   | 278.9±13.8 | 276.8±12.8 | 281.6±11.8 | 277.6±13.4 | 279.3±12.5 | 289±10.4   |

**Table S3.** The actual amount of energy supplied to each group of rats from 1–14 days after burn injury.

|                                            |     | PBD0       | PBD1       | PBD2       | PBD3       | PBD4       | PBD5      | PBD6       | PBD7       | PBD8       | PBD9       | PBD10      | PBD11      | PBD12      | PBD13      | PBD14      |
|--------------------------------------------|-----|------------|------------|------------|------------|------------|-----------|------------|------------|------------|------------|------------|------------|------------|------------|------------|
| <b>Energy supply</b><br><b>(Kcal/kg/d)</b> | C   | 251.7±11.8 | 245.4±11.4 | 246.3±12.7 | 249.3±9.5  | 244.2±9.2  | 249.3±9.4 | 253.7±13.6 | 251.5±11.4 | 244.1±9.2  | 248.2±12.2 | 251.4±12.5 | 252.5±12.6 | 252.1±11.2 | 248.4±14.7 | 251.5±11.3 |
|                                            | 5 % | 193.1±10.5 | 185.7±8.81 | 187.1±3.3  | 175.4±123  | 178.1±9.5  | 185.2±8.5 | 192.2±4.2  | 191.2±10.2 | 263.7±12.9 | 261.4±12.3 | 262.1±6.8  | 259.1±14.4 | 263.2±7.1  | 268.3±10.2 | 267.9±12.1 |
|                                            | 10% | 194.2±12.6 | 182.2±7.1  | 180.1±15.7 | 167.3±14.7 | 172.3±10.7 | 178.4±9.2 | 183.8±10.2 | 182.3±7.7  | 244.8±11.9 | 242.8±12.4 | 248.5±10.8 | 245.5±11.7 | 243.5±8.2  | 249.5±11.4 | 255.2±12.9 |
|                                            | 20% | 190.5±8.4  | 172.7±13.5 | 168.1±11.0 | 158.2±8.2  | 168.1±12.2 | 175.7±8.2 | 180.1±9.2  | 187.2±11.3 | 250.4±10.8 | 269.2±11.8 | 269.3±12.8 | 273.2±11.1 | 273.6±17.8 | 273.1±12.4 | 276.4±10.3 |
|                                            | 30% | 193.9±7.7  | 166. 5±8.6 | 160.2±9.2  | 147.8±8.1  | 163.2±9.5  | 170.3±8.6 | 191.7±8.1  | 202.6±11.8 | 280.4±12.7 | 278.1±12.9 | 276.4±12.1 | 281.2±11.4 | 277.5±13.3 | 279.1±12.6 | 289±10.6   |

**Table S4.** <sup>1</sup>H-NMR characteristic signals of the identified metabolites in serum.

| ID | Metabolites                      | <sup>1</sup> H Shift(δ)                                                                      |
|----|----------------------------------|----------------------------------------------------------------------------------------------|
| 1  | Lipid                            | 0.891(t) 1.210(m) 1.221(m) 1.232(m) 1.590(m) 2.018(m) 2.238(m)<br>2.742(m) 2.749(m) 2.761(m) |
| 2  | Isoleucine                       | 0.943(t) 1.000(d) 1.008(d) 1.284(m) 1.459(m) 1.961(m)                                        |
| 3  | Leucine                          | 0.955(d) 0.965(d) 0.975(d) 1.691(m) 1.707(m) 3.685(dd) 3.753(d)                              |
| 4  | Valine                           | 0.988(d) 1.020(d) 1.040(d) 1.052(d) 2.285(m) 3.570(d) 3.617(d)                               |
| 5  | Isobutyrate                      | 1.361(d)                                                                                     |
| 6  | 3-hydroxybutyrate                | 1.200(d) 2.293(m) 2.380(m) 4.131(m)                                                          |
| 7  | Lactate                          | 1.341(d) 4.108(q)                                                                            |
| 8  | Lysine                           | 1.434(m) 1.689(m) 1.719(m) 1.886(m) 1.897(m) 3.031(t) 3.767(t)                               |
| 9  | Alanine                          | 1.480(d) 1.492(m) 3.783(q)                                                                   |
| 10 | Arginine                         | 1.681(m) 1.730(m) 1.926(m) 3.257(t) 3.774(m)                                                 |
| 11 | Acetate                          | 1.914(s)                                                                                     |
| 12 | N-acetylated glycoproteins (NAG) | 2.04 (s)                                                                                     |
| 13 | O-acetylated glycoproteins (OAG) | 2.14 (s)                                                                                     |
| 14 | Acetoacetate                     | 2.273(s) 3.441(s)                                                                            |
| 15 | Pyruvate                         | 2.318(s) 2.372(s)                                                                            |
| 16 | Glutamine                        | 2.14(m) 2.46(m) 3.77(t)                                                                      |
| 17 | Succinate                        | 2.395(s)                                                                                     |
| 18 | Dimethylamine                    | 2.71(s)                                                                                      |
| 19 | Dimethylglycine                  | 2.930(s) 3.723(s)                                                                            |
| 20 | Creatinine                       | 3.938(s) 3.051(s) 4.066(s)                                                                   |
| 21 | Phenylalanine                    | 3.119(dd) 3.260(dd) 3.962(dd) 3.991(dd)                                                      |
| 22 | Choline                          | 3.208(s) 3.657(m) 4.072(m)                                                                   |
| 23 | Trimethylamine N-oxide (TMAO)    | 3.21(s)                                                                                      |
| 24 | Phosphocholine                   | 3.218(s) 3.585(m) 4.142(m)                                                                   |
| 25 | α-glucose                        | 3.429(t) 3.542(dd) 3.708(t) 3.732(dd) 3.822(dd) 3.840(dd)                                    |
| 26 | Betaine                          | 3.271(s) 3.915(s)                                                                            |
| 27 | Glycine                          | 3.558(s)                                                                                     |
| 28 | Oxalic acid                      | 3.621(s)                                                                                     |
| 29 | Glycerol                         | 3.552(dd) 3.649(dd) 3.795(m)                                                                 |
| 30 | Triglycerides                    | 4.072(m)                                                                                     |

Type of <sup>1</sup>H Shift(δ): s, single; d, doublet; t, triplet; m, multiple; q, quartet; dd, doublet of doublets.

**Table S5.** Identified metabolites from different groups with S-plot, VIP and P-value.

| Metabolites              | VIP     | <i>P</i> -value* |
|--------------------------|---------|------------------|
| <b>Lipid</b>             | 4.10675 | < 0.0001         |
| <b>Isoleucine</b>        | 1.65065 | 0.0386           |
| <b>Leucine</b>           | 1.6876  | 0.0045           |
| <b>3-hydroxybutyrate</b> | 2.95366 | < 0.0001         |
| <b>Lactate</b>           | 9.21987 | 0.0047           |
| <b>Alanine</b>           | 6.30719 | 0.0008           |
| <b>Pyruvate</b>          | 4.26619 | 0.0012           |
| <b>Dimethylamine</b>     | 2.25777 | < 0.0001         |
| <b>Betaine</b>           | 2.99439 | 0.0001           |
| <b>Glycine</b>           | 8.23387 | < 0.0001         |
| <b>Oxalic acid</b>       | 2.28375 | 0.0392           |
| <b>Glutamine</b>         | 2.23501 | 0.0441           |

\* One-way ANOVA for comparisons between multiple groups

**Table S6.** The associated metabolic pathways of the differential metabolites in Table S5.

| Pathway Name                                       | Hits/Total | <i>p</i> -value | FDR   | −log(p) | Impact  |
|----------------------------------------------------|------------|-----------------|-------|---------|---------|
| <b>Alanine, aspartate and glutamate metabolism</b> | 3/28       | 0.00113         | 0.034 | 2.95    | 0.11378 |
| <b>Glyoxylate and dicarboxylate metabolism</b>     | 3/32       | 0.00169         | 0.034 | 2.77    | 0.10582 |
| <b>Glycine, serine and threonine metabolism</b>    | 3/34       | 0.00201         | 0.034 | 2.70    | 0.31772 |
| <b>Pyruvate metabolism</b>                         | 2/22       | 0.01231         | 0.172 | 1.91    | 0.20684 |
| <b>Glycolysis / Gluconeogenesis</b>                | 2/26       | 0.01702         | 0.204 | 1.77    | 0.10044 |
